# Supplementary material for: Staphylococcus aureus Modulates Carotenoid and Phospholipid Content in Response to Oxygen-Restricted Growth Conditions, Triggering Changes in Membrane Biophysical Properties
Source: MDPI journal article supplement (doi:10.3390/ijms241914906), 2023-10-05
Supplement: s1 [file s1]

# Staphylococcus aureus Modulates Carotenoid and Phospholipid Content in Response to Oxygen-Restricted Growth Conditions, Triggering Changes in Membrane Biophysical Properties

Laura Zamudio-Chávez <sup>1</sup>, Elizabeth Suesca <sup>1</sup>, Gerson-Dirceu López <sup>2</sup>, Chiara Carazzone <sup>3</sup>,  
Marcela Manrique-Moreno <sup>4</sup> and Chad Leidy <sup>1,\*</sup>

<sup>1</sup> Biophysics Group, Physics Department, Universidad de los Andes, Bogotá 111211, Colombia; ld.zamudio@uniandes.edu.co (L.Z.-C.); e.suesca87@uniandes.edu.co (E.S.)

<sup>2</sup> PhysCheMath Research Group, Chemistry Department, Universidad de América, Bogotá 111211, Colombia; gerson.lopez@profesores.uamerica.edu.co

<sup>3</sup> Laboratory of Advanced Analytical Techniques in Natural Products (LATNAP), Chemistry Department, Universidad de los Andes, Bogotá 111211, Colombia; c.carazzone@uniandes.edu.co

<sup>4</sup> Chemistry Institute, Faculty of Exact and Natural Sciences, University of Antioquia, Medellín 050010, Colombia; marcela.manrique@udea.edu.co

\* Correspondence: cleidy@uniandes.edu.co; Tel.: +57-1-3394949 (ext. 2741)

**Table S1.** The identified phosphatidyl-glycerol (PG), phospholipid lysyl-phosphatidylglycerol (Lys-PG), and cardiolipin (CL) in extract from *S. aureus*.

| Phosphatidylglycerols [M-H] <sup>-</sup> | Retention Time (min) | <i>m/z</i> | Main fragments ( <i>m/z</i> )      |
|------------------------------------------|----------------------|------------|------------------------------------|
| PG (30:0)                                | 4.02                 | 693.5      | 619, 469, 451, 377, 241, 227.      |
| PG (31:0)                                | 4.95                 | 707.5      | 483, 465, 405, 391, 255, 241, 277. |
| PG (32:0)                                | 5.65                 | 721.5      | 648, 497, 479, 405, 269, 241.      |
| PG (33:0)                                | 6.95                 | 735.5      | 661, 511, 493, 451, 419, 283, 241. |
| PG (34:0)                                | 7.61                 | 749.5      | 675, 525, 507, 433, 297, 269, 241. |
| PG (35:0)                                | 9.08                 | 763.5      | 688, 539, 521, 447, 377, 311, 241. |

| Lysyl phosphatidylglycerols [M+H] <sup>+</sup> | Retention Time (min) | <i>m/z</i> | Main fragments ( <i>m/z</i> )      |
|------------------------------------------------|----------------------|------------|------------------------------------|
| Lys-PG (31:0)                                  | 7.45                 | 837.3      | 819, 802, 537, 410, 301, 283, 266. |
| Lys-PG (32:0)                                  | 8.21                 | 851.3      | 833, 816, 581, 551, 301, 283, 266. |
| Lys-PG (33:0)                                  | 10.32                | 865.5      | 847, 830, 591, 565, 301, 283, 266. |
| Lys-PG (34:0)                                  | 11.27                | 879.3      | 861, 844, 579, 511, 301, 283, 266. |
| Lys-PG (35:0)                                  | 12.73                | 893.4      | 875, 856, 593, 581, 301, 283, 266. |

| Cardiolipins [M-H] <sup>-</sup> | Retention Time (min) | <i>m/z</i> | Main fragments ( <i>m/z</i> ) |
|---------------------------------|----------------------|------------|-------------------------------|
| CL (60:0)                       | 21.04                | 1296.0     | 755, 675, 647, 619, 377.      |

|           |       |        |                                     |
|-----------|-------|--------|-------------------------------------|
| CL (61:0) | 21.75 | 1310.0 | 1068, 769, 647, 633, 619, 391, 377. |
| CL (62:0) | 21.99 | 1323.9 | 1081, 783, 755, 647, 619, 405, 377. |
| CL (63:0) | 22.41 | 1337.9 | 1095, 797, 89, 633, 619, 423, 405.  |
| CL (64:0) | 22.74 | 1352.0 | 1109, 783, 703, 674, 647, 629, 405. |
| CL (65:0) | 23.17 | 1366.0 | 1123, 797, 688, 661, 647, 419, 405. |
| CL (66:0) | 23.36 | 1380.0 | 1137, 811, 783, 675, 647, 433, 405. |
| CL (67:0) | 23.87 | 1394.0 | 825, 784, 689, 675, 647, 447, 433.  |
| CL (68:0) | 24.03 | 1408.0 | 1165, 839, 811, 703, 675, 647, 433. |
| CL (69:0) | 24.32 | 1422.0 | 1179, 825, 731, 689, 675, 447, 433. |
| CL (70:0) | 24.62 | 1436.0 | 1193, 833, 703, 689, 461, 447, 419. |

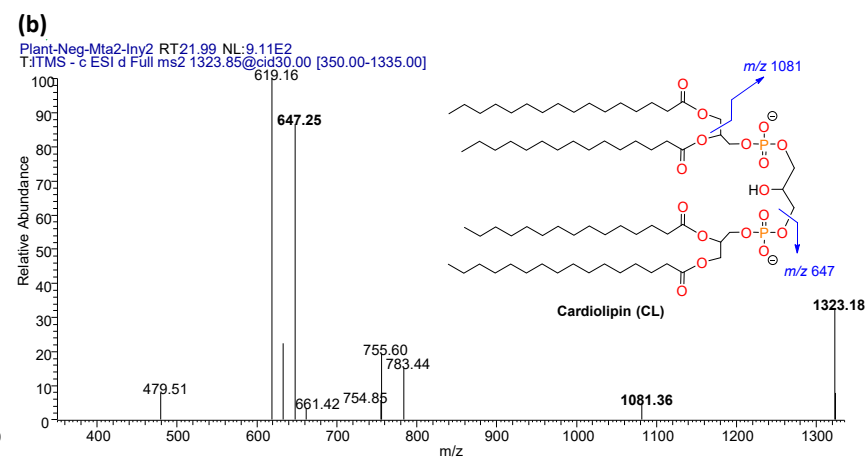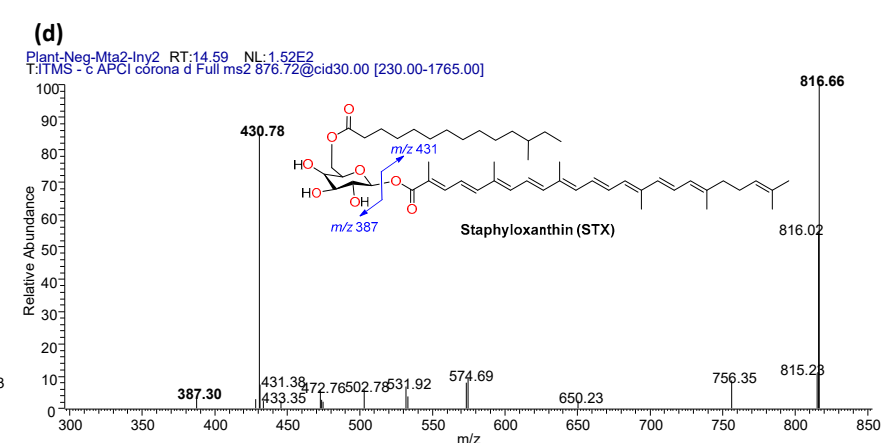

**Figure S1.** MS/MS spectra of Phosphatidylglycerol (a), Cardiolipin (b), Lysyl-Phosphatidylglycerol (c), and Staphyloxanthin (d).

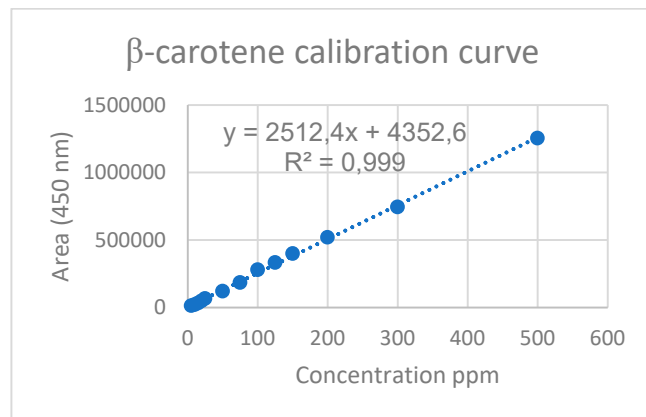

**Figure S2.** Calibration curve of  $\beta$ -carotene used for the quantification of *S. aureus* carotenoids.
